# Supplementary material
Source: PubMed Central journal article supplement (PMC10527168)
Supplement: NIHMS1910278-supplement-1.pdf [file NIHMS1910278-supplement-1.pdf]

## SUPPLEMENTAL FIGURES

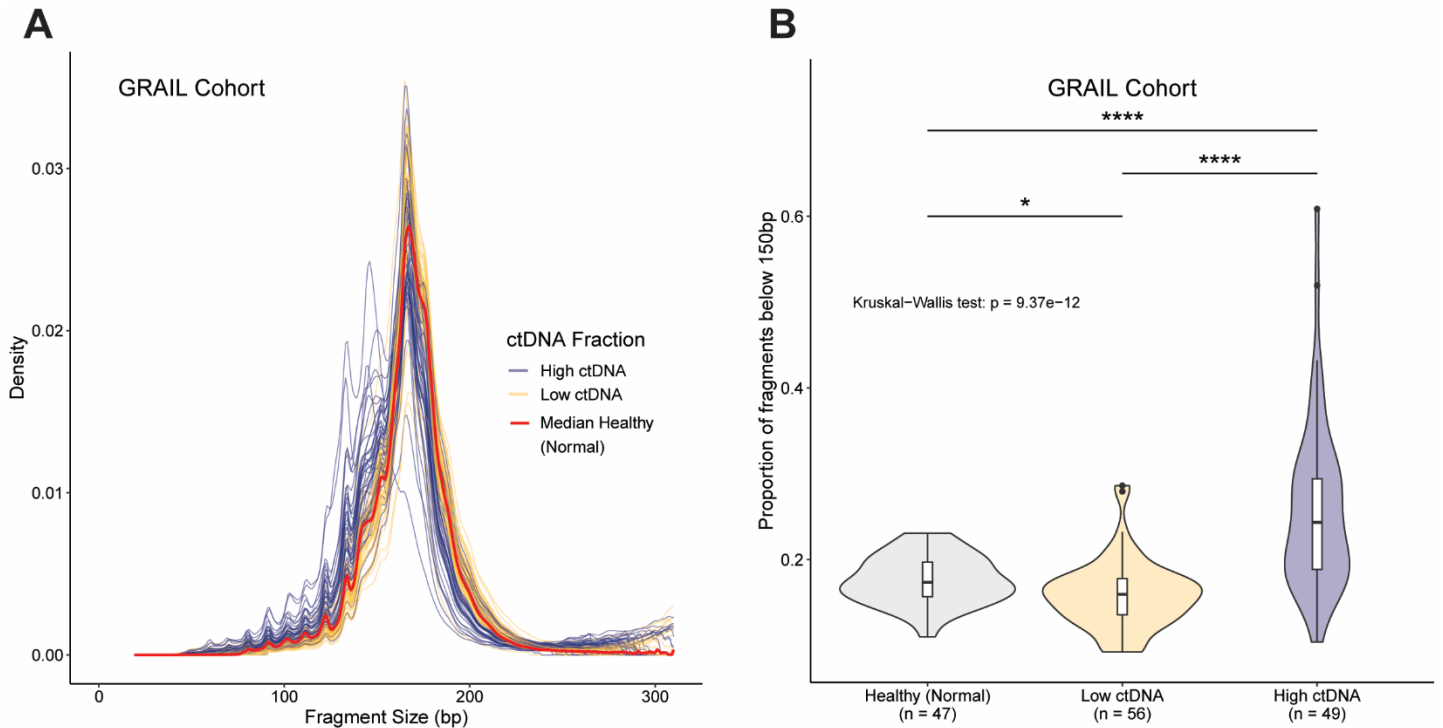

**Figure S1: Fragment distribution of GRAIL cohort samples stratified by ctDNA fraction.**

(A) Distribution of cfDNA fragments from individual samples colored by low ctDNA (< 10% ctDNA fraction) or high ctDNA (ctDNA fraction  $\geq$  10%). Red line represents the median of all normal healthy samples. (B) Proportion of fragments below 150 bp in healthy, low ctDNA, and high ctDNA samples. A Kruskal-Wallis test was performed to compare all three categories, and a Wilcoxon rank sum test was performed for individual comparisons (\* $p < 0.05$ ; \*\*\*\* $p < 0.0001$ )

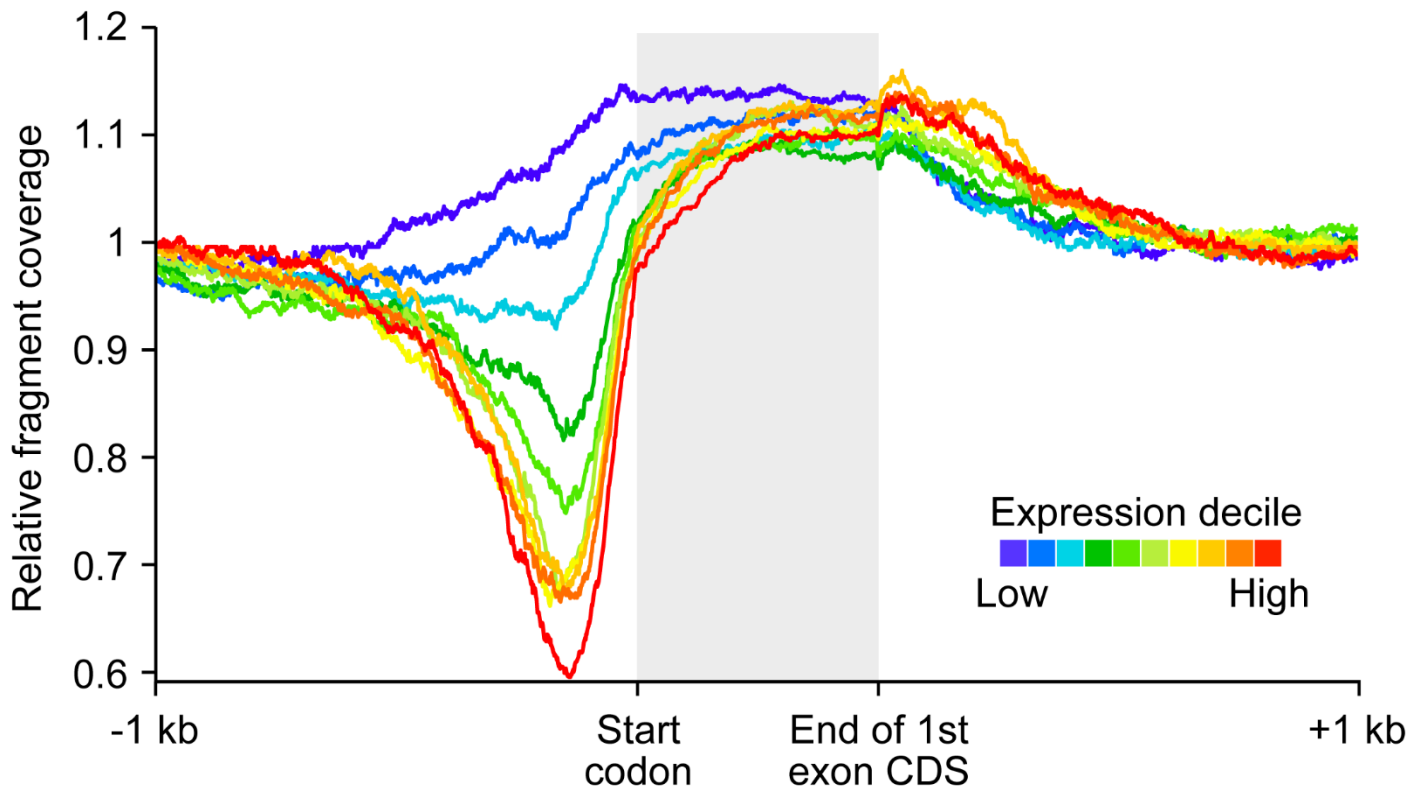

**Figure S2: Relative fragment coverage in first coding exon by gene expression decile.**

Average plasma cell-free DNA fragment coverage near the exon 1 coding sequence (CDS) of 11748 genes annotated in MANE version 0.93, calculated across 41 whole genome sequenced ctDNA-positive samples from the NCT02125357 trial (Herberts et al. Nature 2022). Genes were separated into ten quantile groups based on their average expression in prostate cancer tissue samples. Fragment coverage is normalized relative to 1kb distant flanks. Only multi-exon genes with a CDS containing exon 1 were included in the analysis. Gene orientation and exon 1 CDS length were normalized between the genes for visualization. One kilobase of upstream and downstream flanking region is also shown (without normalization).

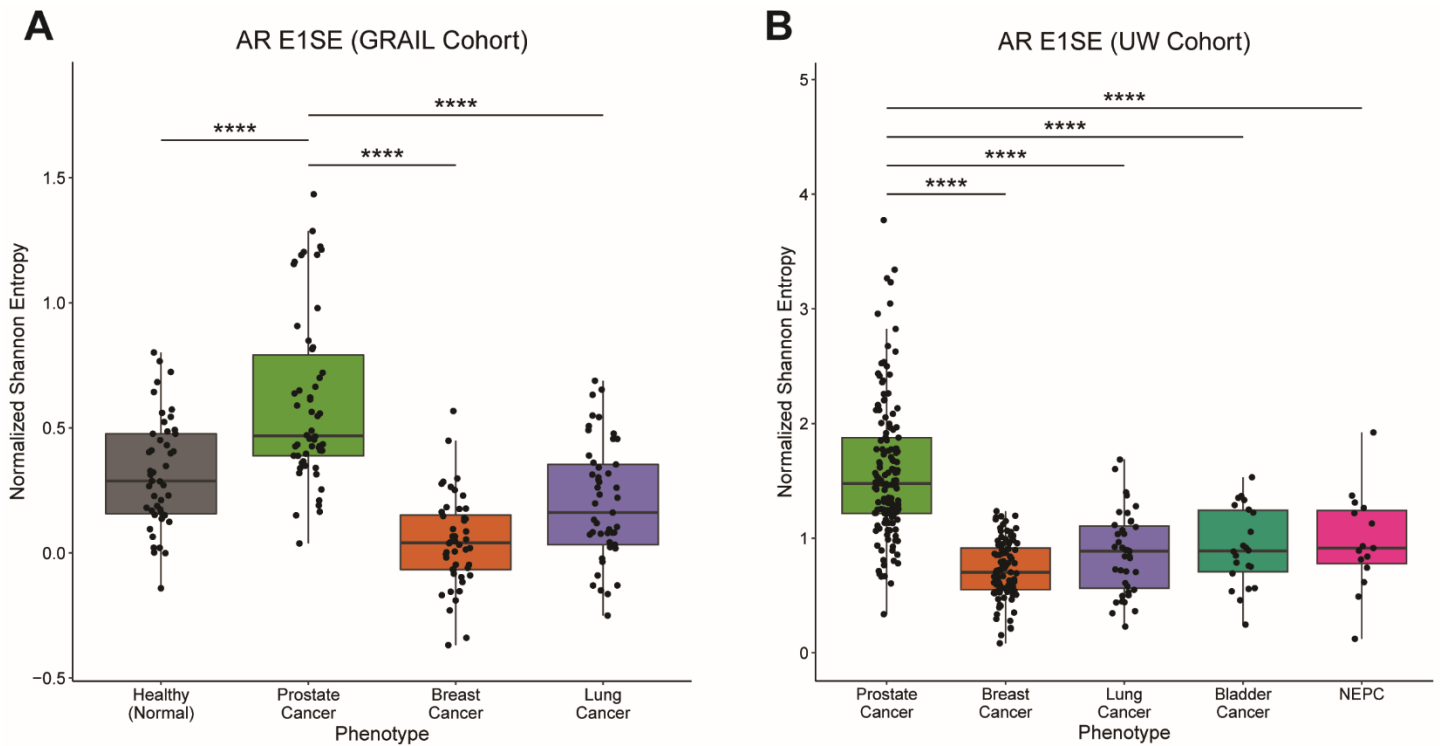

**Figure S3: Exon 1 Shannon entropy of the AR by cancer type.**

Normalized Shannon entropy was calculated for the first coding exon of the androgen receptor gene (AR) for all samples in the GRAIL cohort (A) and UW cohort (B). AR E1SE displays significantly higher normalized Shannon entropy in prostate cancer samples compared to other cancer types and healthy normal samples. Two-sided Student's t-test was used for significance testing (\*\*\*\* $p < 0.0001$ ).

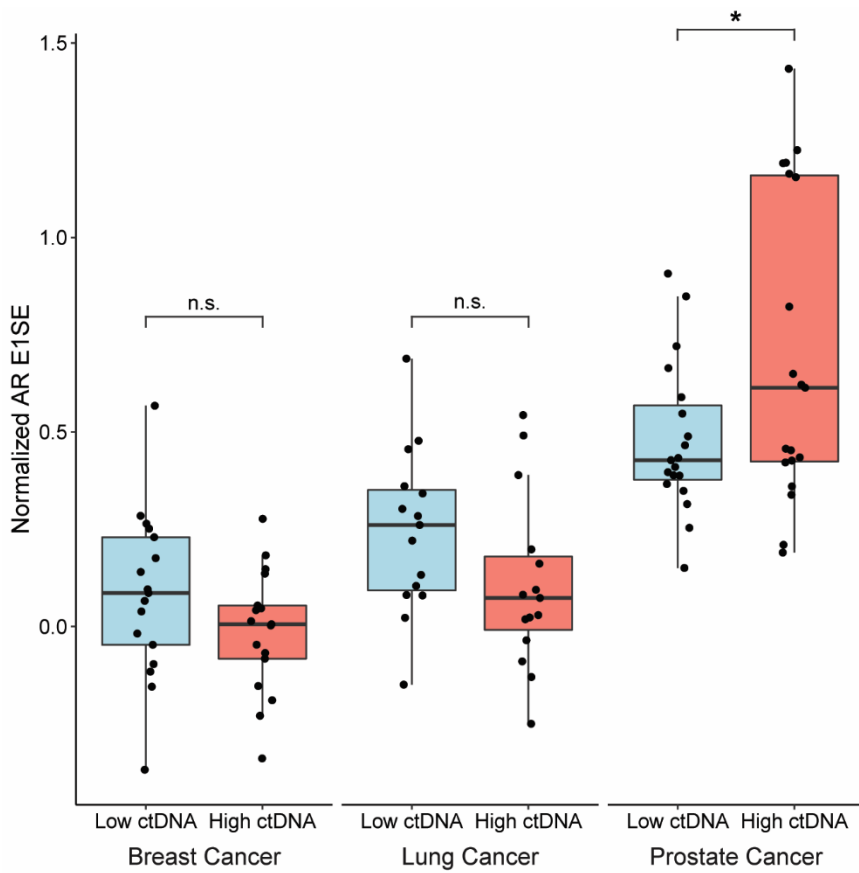

**Figure S4: Normalized AR Shannon entropy stratified by ctDNA fraction**

Within each cancer type, samples were stratified into low and high ctDNA fraction using the median ctDNA fraction as the cutoff. Normalized Shannon entropy at the first coding exon of AR was calculated and plotted by cancer type and ctDNA level. High ctDNA fraction prostate cancer samples were found to have significantly higher AR E1SE compared to low ctDNA fraction prostate cancer samples only. Two-sided Student's t-test was used for significance testing (\* $p < 0.05$ ; n.s. – non significant)

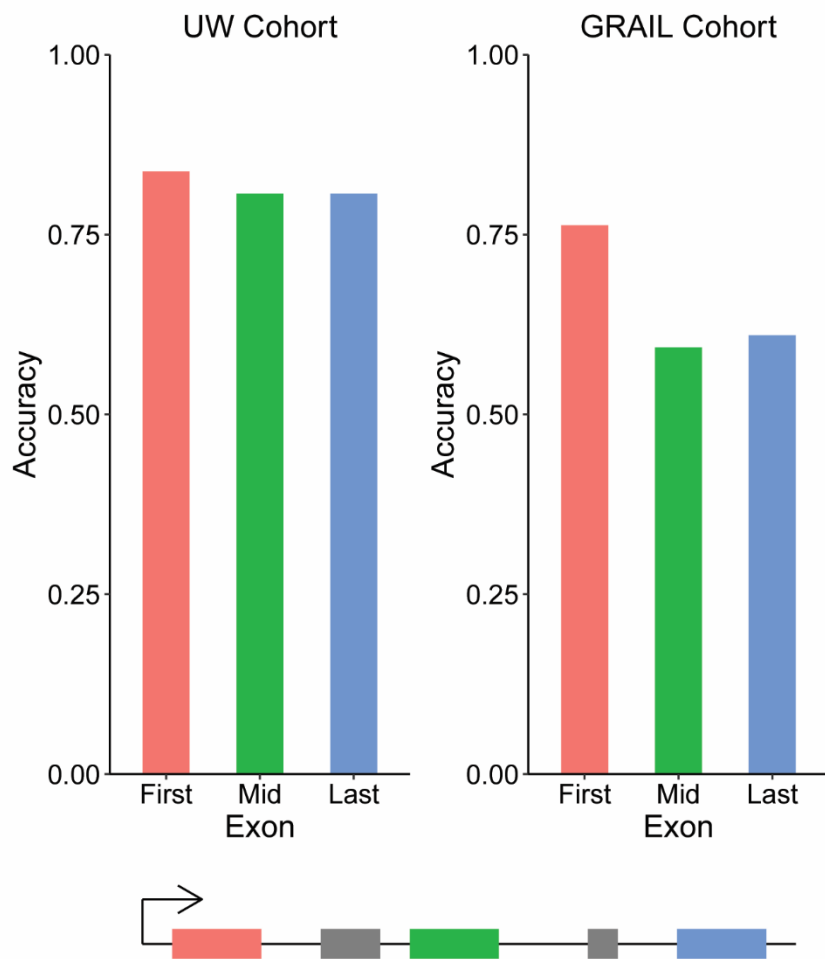

**Figure S5: Model performance using alternative exons.**

Model performance was assessed using Shannon entropies calculated from reads overlapping either the first, middle (mid), or last exons of the genes in each panel (see bottom schematic). For genes with an even number of exons, the exon closest to the TSS of the two middle exons was used. Accuracy was calculated for the UW cohort (left) and the GRAIL cohort (right). In both cohorts, Shannon entropies calculated from the first exon had the highest accuracy.

## SUPPLEMENTAL METHODS

*Summary of differences between GRAIL and UW cohorts:*

### Patients:

**GRAIL:** Patients with metastatic cancer who were progressing on stable doses of treatment. The normal (non-cancer) blood samples were obtained from the San Diego Blood Bank.

**UW:** Patients with metastatic cancer. While in general, patients who were treatment naïve or progressing were preferred, this also included patients who were responding to treatment. Neuroendocrine prostate cancer and bladder cancer were also included, which were not in the GRAIL dataset. No normal blood samples were included, as this was not allowed on the institutional blood collection protocol.

### Sample tubes:

**GRAIL:** Streck tubes were used

**UW:** EDTA or CellSave tubes were used

### cfDNA extraction:

**GRAIL:** QIAamp Circulating Nucleic Acid Kit (Qiagen)

**UW:** QIAamp Circulating Nucleic Acid kit (Qiagen)

### Library preparation:

**GRAIL:** Illumina TruSeq DNA nano protocol with 6mer UMIs (Illumina)

**UW:** xGen Prism DNA library preparation kit with 8mer UMIs (Integrated DNA Technologies)

### Target capture:

**GRAIL:** Custom 2.1Mb panel with 508 cancer genes using Illumina Nextera Rapid Capture protocol (Illumina)

**UW:** Custom 2.4Mb panel with 822 cancer genes using the xGen hybridization capture kit (Integrated DNA Technologies)

### Sequencing Depth:

**GRAIL:** average raw cfDNA sequencing depth 71,749X

**UW:** average raw cfDNA sequencing depth 3,042X

## SUPPLEMENTAL TABLES

**Table S1: cfDNA fraction of samples with available germline sequencing.**

| ID    | Phenotype | ctDNA fraction |
|-------|-----------|----------------|
| BL_1  | Bladder   | 0.0080         |
| BL_2  | Bladder   | 0.0119         |
| BL_3  | Bladder   | 0.0080         |
| BL_4  | Bladder   | 0.0421         |
| BL_5  | Bladder   | 0.1516         |
| BL_6  | Bladder   | 0.6395         |
| BL_7  | Bladder   | 0.6537         |
| BL_8  | Bladder   | 0.6250         |
| BL_9  | Bladder   | 0.6362         |
| BL_10 | Bladder   | 0.6193         |
| BL_11 | Bladder   | 0.6408         |
| BL_12 | Bladder   | 0.6390         |
| BR_1  | Breast    | 0.0040         |
| BR_2  | Breast    | 0.2788         |
| BR_3  | Breast    | 0.0040         |
| BR_4  | Breast    | 0.0344         |
| BR_5  | Breast    | 0.3264         |
| BR_6  | Breast    | 0.1421         |
| BR_7  | Breast    | 0.0149         |
| BR_8  | Breast    | 0.0769         |
| BR_9  | Breast    | 0.1843         |
| BR_10 | Breast    | 0.0040         |
| BR_11 | Breast    | 0.0208         |
| BR_12 | Breast    | 0.0373         |
| BR_13 | Breast    | 0.0080         |
| BR_14 | Breast    | 0.0070         |
| BR_15 | Breast    | 0.0139         |
| BR_16 | Breast    | 0.0139         |
| BR_17 | Breast    | 0.0469         |
| BR_18 | Breast    | 0.0383         |
| BR_19 | Breast    | 0.0139         |
| BR_20 | Breast    | 0.0070         |
| BR_21 | Breast    | 0.0188         |
| BR_22 | Breast    | 0.0070         |
| BR_23 | Breast    | 0.6395         |
| BR_24 | Breast    | 0.6357         |
| BR_25 | Breast    | 0.6418         |
| BR_26 | Breast    | 0.6343         |
| BR_27 | Breast    | 0.0247         |
| BR_28 | Breast    | 0.0090         |
| BR_29 | Breast    | 0.0325         |

|       |        |        |
|-------|--------|--------|
| BR_30 | Breast | 0.0109 |
| BR_31 | Breast | 0.1326 |
| BR_32 | Breast | 0.0090 |
| BR_33 | Breast | 0.0564 |
| BR_34 | Breast | 0.0109 |
| BR_35 | Breast | 0.1575 |
| BR_36 | Breast | 0.0090 |
| BR_37 | Breast | 0.0060 |
| BR_38 | Breast | 0.0554 |
| BR_39 | Breast | 0.0889 |
| BR_40 | Breast | 0.0421 |
| BR_41 | Breast | 0.0198 |
| BR_42 | Breast | 0.0060 |
| BR_43 | Breast | 0.6092 |
| BR_44 | Breast | 0.2847 |
| BR_45 | Breast | 0.0305 |
| BR_46 | Breast | 0.3871 |
| BR_47 | Breast | 0.2222 |
| BR_48 | Breast | 0.5185 |
| BR_49 | Breast | 0.0188 |
| BR_50 | Breast | 0.0354 |
| BR_51 | Breast | 0.0129 |
| BR_52 | Breast | 0.1843 |
| BR_53 | Breast | 0.1876 |
| BR_54 | Breast | 0.0478 |
| BR_55 | Breast | 0.0658 |
| BR_56 | Breast | 0.1793 |
| BR_57 | Breast | 0.0139 |
| BR_58 | Breast | 0.0440 |
| BR_59 | Breast | 0.0601 |
| LU_1  | Lung   | 0.0109 |
| LU_2  | Lung   | 0.0119 |
| LU_3  | Lung   | 0.0100 |
| LU_4  | Lung   | 0.0080 |
| LU_5  | Lung   | 0.2293 |
| LU_6  | Lung   | 0.0050 |
| LU_7  | Lung   | 0.0169 |
| LU_8  | Lung   | 0.2159 |
| LU_9  | Lung   | 0.0276 |
| LU_10 | Lung   | 0.6702 |
| LU_11 | Lung   | 0.1456 |
| LU_12 | Lung   | 0.0100 |
| LU_13 | Lung   | 0.0149 |
| LU_14 | Lung   | 0.0159 |
| LU_15 | Lung   | 0.0198 |
| LU_16 | Lung   | 0.5385 |



|       |          |        |
|-------|----------|--------|
| NE_1  | NEPC     | 0.3812 |
| PR_1  | Prostate | 0.2087 |
| PR_2  | Prostate | 0.0060 |
| PR_3  | Prostate | 0.0149 |
| PR_4  | Prostate | 0.3008 |
| PR_5  | Prostate | 0.0169 |
| PR_6  | Prostate | 0.0237 |
| PR_7  | Prostate | 0.0178 |
| PR_8  | Prostate | 0.0227 |
| PR_9  | Prostate | 0.0450 |
| PR_10 | Prostate | 0.5130 |
| PR_11 | Prostate | 0.0354 |
| PR_12 | Prostate | 0.0129 |
| PR_13 | Prostate | 0.0159 |
| PR_14 | Prostate | 0.0198 |
| PR_15 | Prostate | 0.0080 |
| PR_16 | Prostate | 0.0526 |
| PR_17 | Prostate | 0.0686 |
| PR_18 | Prostate | 0.4019 |
| PR_19 | Prostate | 0.4436 |
| PR_20 | Prostate | 0.4550 |
| PR_21 | Prostate | 0.3819 |
| PR_22 | Prostate | 0.4544 |
| PR_23 | Prostate | 0.5866 |
| PR_24 | Prostate | 0.1079 |
| PR_25 | Prostate | 0.0227 |
| PR_26 | Prostate | 0.1007 |
| PR_27 | Prostate | 0.5856 |
| PR_28 | Prostate | 0.2087 |
| PR_29 | Prostate | 0.0129 |
| PR_30 | Prostate | 0.6550 |
| PR_31 | Prostate | 0.0276 |
| PR_32 | Prostate | 0.1061 |
| PR_33 | Prostate | 0.3122 |
| PR_34 | Prostate | 0.3165 |
| PR_35 | Prostate | 0.0852 |
| PR_36 | Prostate | 0.1626 |
| PR_37 | Prostate | 0.3580 |
| PR_38 | Prostate | 0.2766 |
| PR_39 | Prostate | 0.0218 |
| PR_40 | Prostate | 0.6038 |
| PR_41 | Prostate | 0.3532 |
| PR_42 | Prostate | 0.1481 |
| PR_43 | Prostate | 0.5648 |
| PR_44 | Prostate | 0.1369 |
| PR_45 | Prostate | 0.1481 |

|       |          |        |
|-------|----------|--------|
| PR_46 | Prostate | 0.0497 |
| PR_47 | Prostate | 0.6283 |
| PR_48 | Prostate | 0.5658 |
| PR_49 | Prostate | 0.3580 |
| PR_50 | Prostate | 0.0188 |
| PR_51 | Prostate | 0.0257 |
| PR_52 | Prostate | 0.2127 |
| PR_53 | Prostate | 0.0169 |
| PR_54 | Prostate | 0.5846 |
| PR_55 | Prostate | 0.2095 |
| PR_56 | Prostate | 0.6320 |
| PR_57 | Prostate | 0.1635 |
| PR_58 | Prostate | 0.1958 |
| PR_59 | Prostate | 0.6418 |
| PR_60 | Prostate | 0.0159 |
| PR_61 | Prostate | 0.2935 |
| PR_62 | Prostate | 0.0080 |
| PR_63 | Prostate | 0.0119 |
| PR_64 | Prostate | 0.0030 |
| PR_65 | Prostate | 0.0050 |
| PR_66 | Prostate | 0.0100 |
| PR_67 | Prostate | 0.5658 |
| PR_68 | Prostate | 0.7707 |
| PR_69 | Prostate | 0.3607 |
| PR_70 | Prostate | 0.0611 |
| PR_71 | Prostate | 0.0080 |
| PR_72 | Prostate | 0.2533 |
| PR_73 | Prostate | 0.1282 |
| PR_74 | Prostate | 0.0714 |
| PR_75 | Prostate | 0.0276 |
| PR_76 | Prostate | 0.0070 |
| PR_77 | Prostate | 0.0227 |
| PR_78 | Prostate | 0.4797 |
| PR_79 | Prostate | 0.5343 |
